# Supplementary material
Source: PubMed Central journal article supplement (PMC3193486)
Supplement: cr201171x1.pdf [file cr201171x1.pdf]

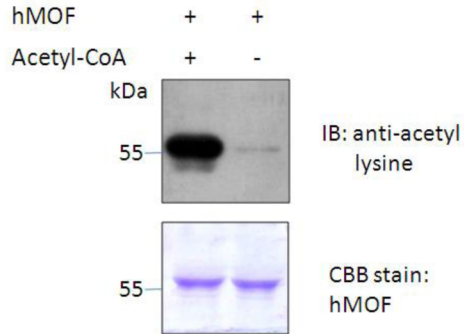

**Figure S1.** In vitro autoacetylation of hMOF. The GST-hMOF proteins were cleaved by thrombin to remove the GST tags. The “pure” hMOF proteins were incubated with or without Acetyl CoA in the HAT buffer at 30 degrees for 1h. The acetylation signals were detected by Western blot using anti-acetyl lysine antibody. CBB stain showed equal loading.
