# Supplementary material
Source: PubMed Central journal article supplement (PMC3193486)
Supplement: cr201171x2.pdf [file cr201171x2.pdf]

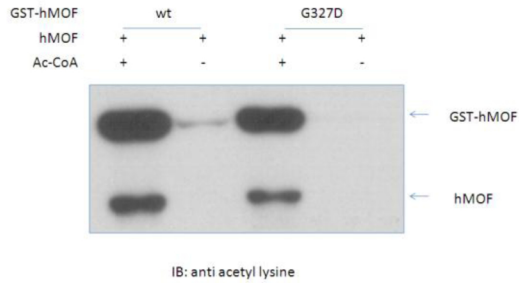

**Figure S2.** In vitro autoacetylation of GST-hMOF constructs. The wild-type GST-hMOF proteins or the G327D proteins were incubated with the active hMOF without GST tag in the HAT buffer at 30 degrees for 1h. The acetylation signals were detected by Western blot using anti-acetyl lysine antibody.
