# Supplementary material
Source: PubMed Central journal article supplement (PMC3193486)
Supplement: cr201171x3.pdf [file cr201171x3.pdf]

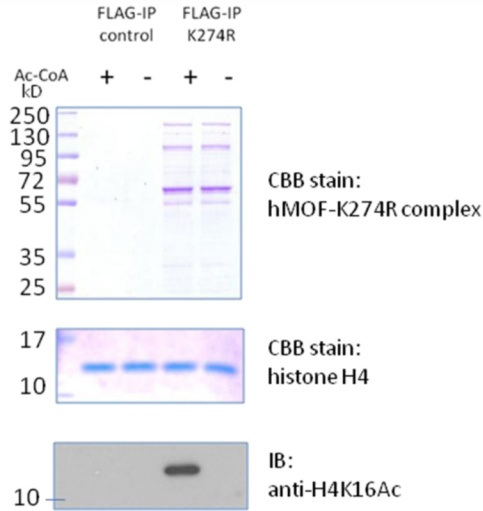

**Figure S3.** In vitro HAT assay was carried out using FLAG-IP purified mammalian hMOF-K274R complex. The blank HeLa cells or HeLa cells stably expressing FH-hMOF-K274R were lysed in IP buffer (20mM Tris-Cl pH8.0, 150mM NaCl, 1% Triton X-100) followed by FLAG-IP. The protein complexes were eluted by FLAG peptides and the in vitro HAT assays were performed using histones H4 as substrates. The reaction products were then separated by 15% SDS-PAGE and stained with CBB or blotted for detection by anti-H4K16Ac antibody.
