# Supplementary material
Source: PubMed Central journal article supplement (PMC3193486)
Supplement: cr201171x4.pdf [file cr201171x4.pdf]

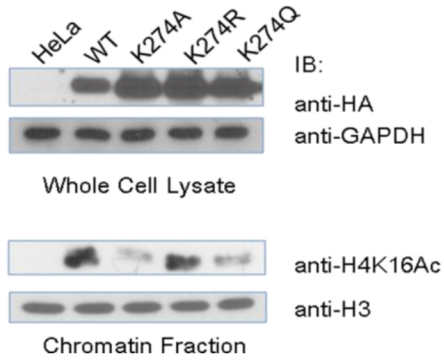

**Figure S4.** Measurement of H4K16Ac levels from blank HeLa cells and HeLa cells with ectopic hMOF expression. HeLa cells were infected with retro-viruses expressing wild-type hMOF, K274A, K274R or K274Q mutants, and 72h after infection the cells were harvested for Western blot.
