# Supplementary material
Source: PubMed Central journal article supplement (PMC3193486)
Supplement: cr201171x5.pdf [file cr201171x5.pdf]

**Table S1. Primers used in this study.**

| Name    | Forward                | Reverse                | Usage     |
|---------|------------------------|------------------------|-----------|
| hMOF    | AGTACCCTGCAATCCCTCAAT  | GAGAGCTTGACTTGCTTGTGC  | qRT-PCR   |
| HoxA9   | AGCGGTGCCCCTATACAAAAC  | TGCCTCTCGGTGAGGTTGAG   | qRT-PCR   |
| GAPDH   | GGTGAAGGTCGGAGTCAACGGA | GAGGGATCTCGCTCCTGGAAGA | qRT-PCR   |
| HoxA9-A | TTTCCGACTTCCC GCCAG    | CCAAATCGCATTGTCGCTCT   | ChIP-qPCR |
| HoxA9-B | CTCACCGAGAGGCAGGTCAAG  | AAGCCCAAATGGCATCACTC   | ChIP-qPCR |
